# Supplementary material for: Growth-inducing effects of argon plasma on soybean sprouts via the regulation of demethylation levels of energy metabolism-related genes
Source: PubMed Central journal article supplement (PMC5294452; doi:10.1038/srep41917), 2017-02-07
Supplement: srep41917-s1.pdf [file srep41917-s1.pdf]

**Growth-inducing effects of argon plasma on soybean sprouts via the regulation of  
demethylation levels of energy metabolism-related genes**

Jiao Jiao Zhang<sup>1, #</sup>, Jin Oh Jo<sup>2, #</sup>, Do Luong Huynh<sup>1</sup>, Raj Kumar Mongre<sup>1</sup>, Mrinmoy Ghosh<sup>1</sup>, Amit  
Kumar Singh<sup>1</sup>, Sang Baek Lee<sup>2</sup>, Young Sun Mok<sup>2, \*</sup>, Park Hyuk<sup>3</sup>, and Dong Kee Jeong<sup>1, \*</sup>

<sup>1</sup>Laboratory of Animal Genetic Engineering and Stem Cell Biology, Department of Animal  
Biotechnology and Advance Next Generation Convergence Technology, Jeju National University, Jeju  
690756, South Korea

<sup>2</sup>Department of Chemical and Biological Engineering, Jeju National University, Jeju 690756, South  
Korea

<sup>3</sup>Intellectual Property Law Firm PCR, Seoul 06194, South Korea

*\*Correspondence and requests for materials should be addressed to D. K. J. (dkjeong@jejunu.ac.kr)  
and Y. S. M. (smokie@jejunu.ac.kr)*

*#These authors contributed equally to this work.*

Supplementary Figure S1. Effects of plasma at different potentials for 1 min on (a) 6-day-old soybean sprouts appearance, (b) average stem length, (c) average root length, and (d) average weight of soybean sprouts on days 2, 4, and 6. Error bars indicated standard error ( $n = 3$ ). \*,  $p < 0.05$  versus control; \*\*,  $p < 0.01$  versus control, according to LSD test.

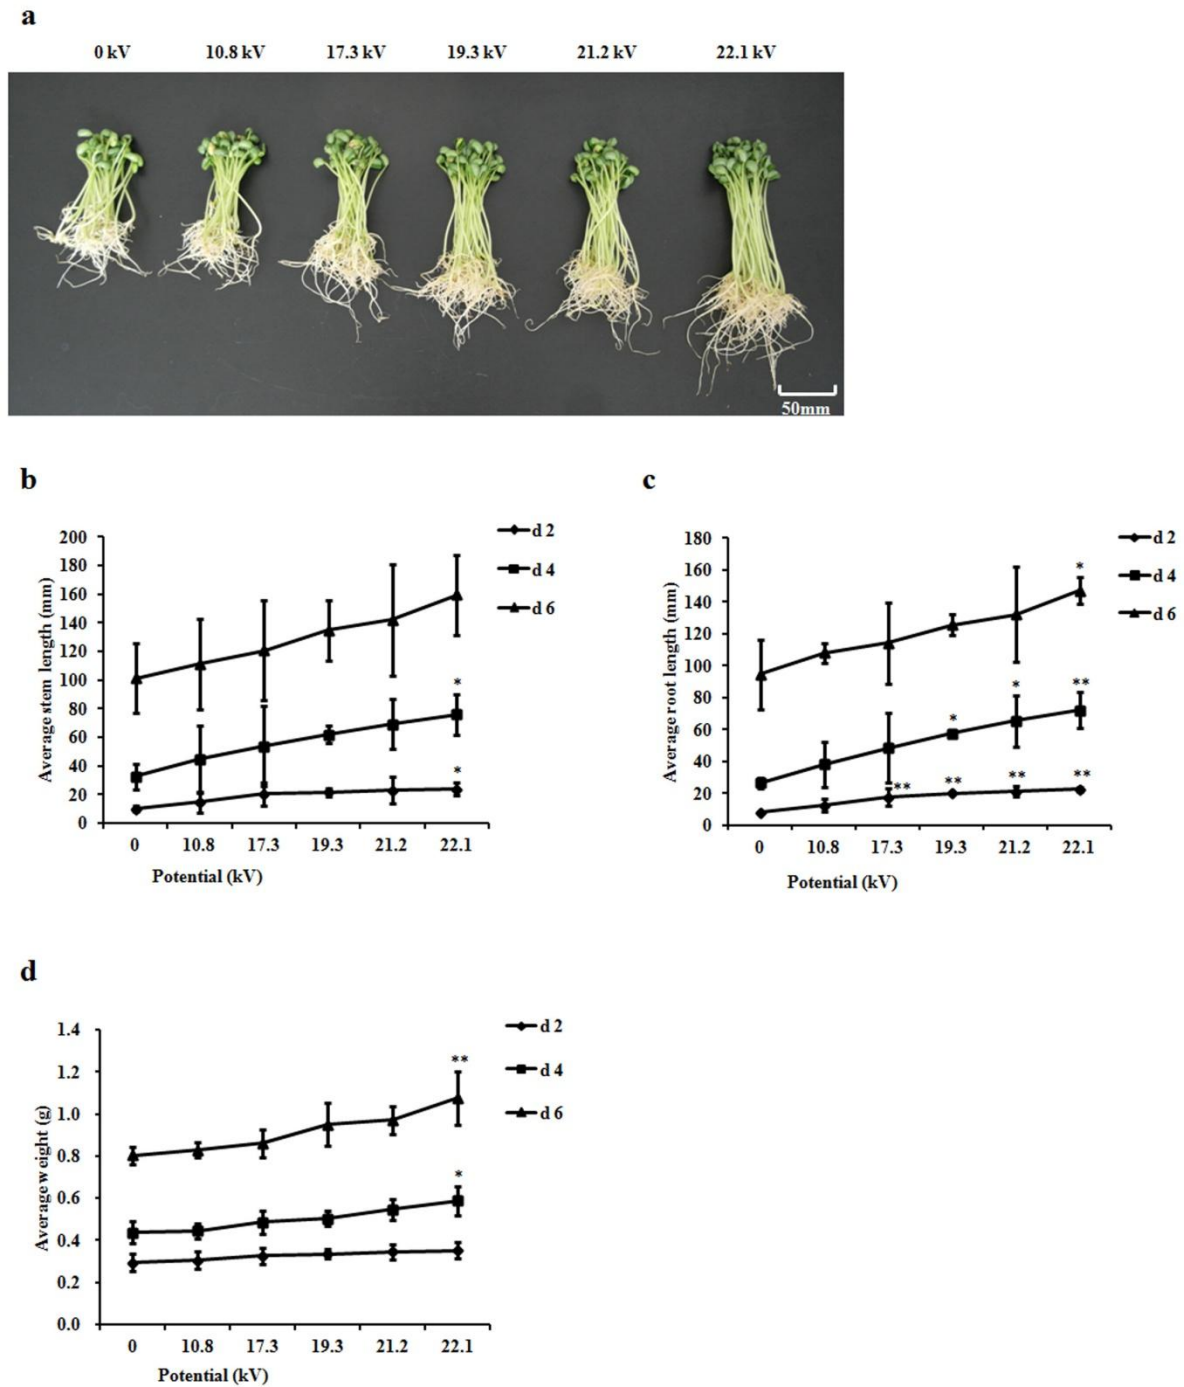

Supplementary Figure S2. Effects of plasma at different potentials for 2 min on (a) 6-day-old soybean sprouts appearance, (b) average stem length, (c) average root length, and (d) average weight of soybean sprouts on days 2, 4, and 6. Error bars indicated standard error ( $n = 3$ ). \*,  $p < 0.05$  versus control; \*\*,  $p < 0.01$  versus control, according to LSD test.

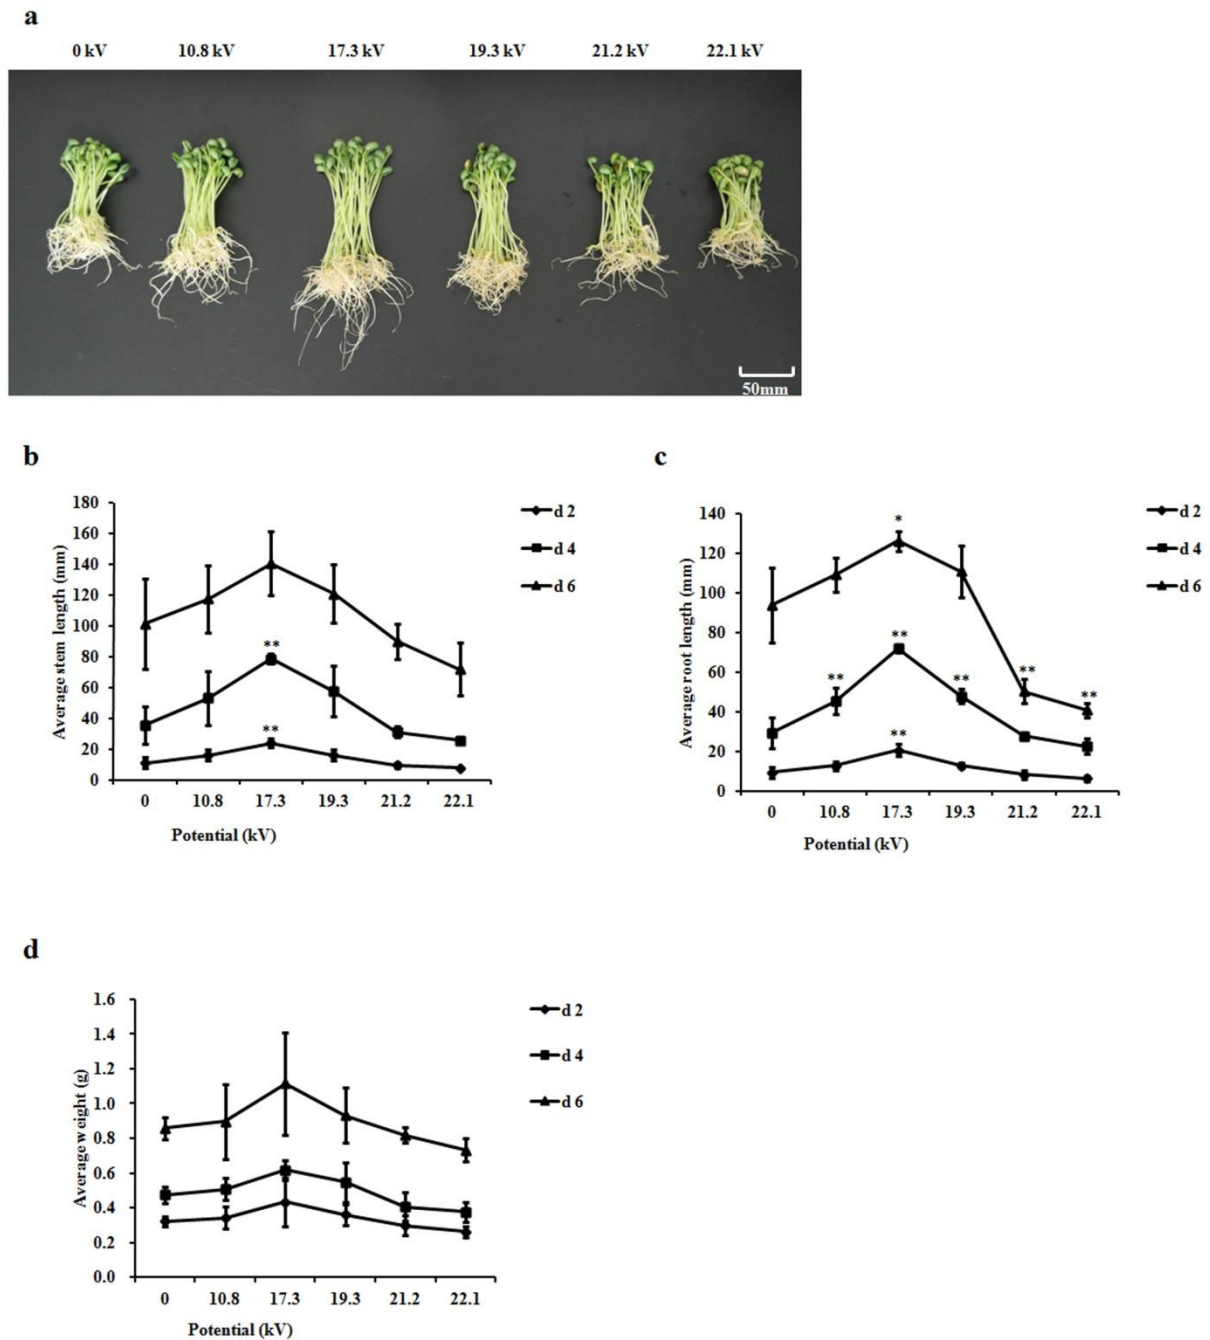

**Supplementary Table S3. Effects of plasma at different potentials and exposure durations on germination and production rates of soybean sprouts**

| Potential (kV) | Germination rate (%) |                | Production rate (%) |               |
|----------------|----------------------|----------------|---------------------|---------------|
|                | Exposure duration    |                | Exposure duration   |               |
|                | 1 min                | 2 min          | 1 min               | 2 min         |
| 0              | 80.44 ± 2.03         | 81.42 ± 2.77   | 4.72 ± 0.51         | 5.11 ± 0.35   |
| 10.8           | 80.42 ± 1.22         | 86.42 ± 1.94*  | 4.81 ± 0.24         | 5.88 ± 0.67   |
| 17.3           | 83.36 ± 3.05         | 88.33 ± 1.96** | 5.28 ± 0.33         | 7.82 ± 0.41** |
| 19.3           | 83.55 ± 1.97         | 84.38 ± 4.20   | 5.93 ± 0.57*        | 5.93 ± 0.39*  |
| 21.2           | 86.54 ± 2.20**       | 78.60 ± 1.03   | 6.12 ± 0.65*        | 4.72 ± 0.52   |
| 22.1           | 90.42 ± 1.93**       | 74.60 ± 2.13** | 6.80 ± 1.06**       | 4.13 ± 0.24*  |

Within a column: \*,  $p < 0.05$  versus control; \*\*,  $p < 0.01$  versus control, according to LSD test.

**Supplementary Table S4. Primer sequences for RT-PCR**

| Gene           | Sequence number | Sequence position | Product length (bp) | Sequence (5'to3')                                       |
|----------------|-----------------|-------------------|---------------------|---------------------------------------------------------|
| $\beta$ -actin | CA937380.1      | 248-377           | 130                 | F: CTACTGGGTTTAGAGGCTCATGG<br>R: AACCTGCCATAGAAGAAGTGCC |
| ATP a1         | XM_003540456.2  | 397-534           | 138                 | F: CCTGCTCCCGGTATTATTTCG<br>R: TGCTGTTTTACCCGTTTGTCTG   |
| ATP a2         | XM_006588217.1  | 184-347           | 164                 | F: GGCATTGCTTTGAATTTGGAA<br>R: ATTGGTTTAGCCAGGGCATTTA   |
| ATP b1         | XM_003536602.2  | 396-492           | 97                  | F: AGGCGTTGTCCGAACCATT<br>R: ACCAACTGGAACGGTAATAGGG     |
| ATP b2         | XM_003555884.2  | 603-706           | 104                 | F: TGAGCAAGAAACCGCACAGC<br>R: CAGCACCACCAAACAACCCA      |
| ATP b3         | XM_006584177.1  | 211-399           | 189                 | F: GTTGGAGAACGAACCCGAGAA<br>R: AGCATCACGGAAGTGTTTAGCC   |
| ATP MI25       | XM_003550048.2  | 419-545           | 127                 | F: CTCCTGTTCGCATCCGTCTTC<br>R: ACCACCAAGCTCTCTCGAATGA   |
| TOR            | XM_003517543.2  | 182-293           | 112                 | F: TGGGCAAATCATCCACAGG<br>R: ATGCTGCCGAACCTTTGTCAAC     |
| GRF 1          | XM_003534897.2  | 849-1007          | 159                 | F: CCACTCAAAGCAGCAGCAACA<br>R: TCATCCAAATCAAGCCAAGACC   |
| GRF 2          | XM_003518751.2  | 176-316           | 141                 | F: TGAACAGACCAAGTGAGAAGCG<br>R: AATCAGCAGTGAAAGCCAACG   |
| GRF 3          | XM_003542518.2  | 743-854           | 112                 | F: AGCCTGACAATGGTGAAAGCA<br>R: CCAGTGGACAATTTCAACGACA   |
| GRF 4          | XM_003537618.2  | 609-702           | 94                  | F: GGAGCCACAGATGGACAACACT<br>R: ATCACCTTGCAACATGGAATTAT |
| GRF 5          | XM_003547671.2  | 100-294           | 195                 | F: ACAGGAACACCTATCCCACCAG<br>R: TGCCTCCTTTGAACATCTCCAT  |
| GRF 6          | XM_003549320.2  | 662-835           | 174                 | F: ACAGCACAGACCCTGAGCCA<br>R: TGTTAGTGGTGGTGAGGGCAT     |

ATP a1, Glycine max ATP synthase subunit alpha, chloroplastic-like (LOC100815582). ATP a2, Glycine max ATP synthase subunit alpha, chloroplastic-like (LOC102661828). ATP b1, Glycine max ATP synthase subunit beta, mitochondrial-like (LOC100797948). ATP b2, Glycine max ATP synthase subunit beta, mitochondrial-like (LOC100789705). ATP b3, Glycine max ATP synthase subunit beta, mitochondrial-like (LOC100783395). ATP MI25, Glycine max ATP synthase protein MI25-like (LOC100816723). TOR, Glycine max serine/threonine-protein kinase TOR-like (LOC100816558). GRF 1, Glycine max growth-regulating factor

1-like (LOC100814271). GRF 2, Glycine max root meristem growth factor 2-like (LOC100818175). GRF 3, Glycine max growth-regulating factor 3-like (LOC100817197). GRF 4, Glycine max growth-regulating factor 4-like (LOC100817313). GRF 5, Glycine max growth-regulating factor 5-like (LOC100814760). GRF 6, Glycine max growth-regulating factor 6-like (LOC100819396).

**Supplementary Table S5. Primer sequences for bisulfite-sequencing PCR**

| Gene   | Sequence number | Sequence position | Product length (bp) | Sequence (5'to3')                                                   | Expected No. of CpGs |
|--------|-----------------|-------------------|---------------------|---------------------------------------------------------------------|----------------------|
| ATP a1 | XM_003540456.2  | 123-423           | 301                 | F: TGAATAGTTGGAAAAAGTTTAAGTT<br>R: CATACCAATATTAACACTAACAATAC       | 13                   |
| ATP b1 | XM_003536602.2  | 42-408            | 367                 | F: TTTTTTTTGAAGATGGTTTTA<br>R: AATAATCCAAAACCTCCAAC                 | 38                   |
| TOR    | XM_003517543.2  | 324-612           | 289                 | F: TTGAAGAAGTATTTAGAGGAAGAAGTT<br>R: CCCCAACCCTAACAAAATAAC          | 17                   |
| GRF 5  | XM_003547671.2  | 1279-1590         | 312                 | F: AGGTTAAGTAAAGAGAAAGAAGTTGAGATA<br>R: AACACAAATCCTACTATAATCCCCTAC | 4                    |
| GRF 6  | XM_003549320.2  | 987-1162          | 176                 | F: GGAGGTTTTTATTTGGGATTTTTTA<br>R: CCTAATTAACCTTCCACAACTTTCT        | 6                    |
